# Supplementary material
Source: MDPI journal article supplement (https://www.mdpi.com/2075-163X/10/7/626)
Supplement: s1 [file s1]

## Sheet: Resource estimates
No_fig	province	Deposit/company name	Aveage TC	tonnage(Mt)	contained graphite (Mt)	Reference	access date
1	Senja	Traelen	31	1.8	0.558
2	Senja	Vardfjellet	9.19	12.8423	1.18021
3	Senja	Hesten	5.77	2.06695	0.119263
4	Senja	Bukkeen area	6.54	51.0256	3.33708
5	Senja	Litljkollen	5.3	34.5424	1.83075
6	Senja	Grunnvåg	5.23	22.7661	1.19067
7	Senja	Skardsvåg	2.1	na	na
7	Vesterålen	Haugsnes	16.2	8.40417	1.36148
8	Vesterålen	Kjerkhaugen	6.5	2.41944	0.157263
9	Vesterålen	Møkland	13.2	3.40341	0.449251
10	Vesterålen	Rise	7.9	0.187221	0.0147905
11	Vesterålen	Sommarland	12.5	0.846626	0.105828
12	Vesterålen	Brenna	10.1	7.93712	0.801649
13	Vesterålen	Evassåsen	7.6	2.11657	0.160859
14	Vesterålen	Vikeid Central	13.8	8.88958	1.22676
15	Vesterålen	Vikeid West	11.3	29.6319	3.34841
16	Vesterålen	Ånstad	36.8	0.211657	0.0778896
17	Vesterålen	Alsvåg	8.9	0.253988	0.0226049
18	Vesterålen	Instøya	9.3	14.816	1.37788
19	Vesterålen	Rødhamran	14.8	1.38254	0.204615
20	Vesterålen	Romset	14.7	9.62748	1.41524
21	Vesterålen	Skogsøya	20	1.41643	0.283287
22	Vesterålen	Smines	7.1	18.8858	1.34089
24	Vesterålen	Jennestad	9.6	3.4404	0.330278
24	Vesterålen	Svinøya	11.7	0.169325	0.0198111
27	Holandsfjord	Nord-Værnes	4.08	0.601718	0.0245501
28	Holandsfjord	Rendalsvik	11.1	1.90491	0.211445		accessed date
29	International	Syrah	10.2	113.29	11.6	http://www.syrahresources.com.au/balama-project	2020-02-19
30	International	Valence	7.1	6.47	0.46	no link (liquidated?)
31	International	Triton	5.52	103	5.72	https://www.tritonminerals.com/projects/	19.02.202
32	International	Lambo	4.73	7.135	0.33	no link (liquidated?)
33	International	Eco graphite	6.5	17.7	1.15	https://www.ecograf.com	2020-02-19
34	International	Talga	25.3	12.3	3.11	www.talgaresources.com/	2020-02-19
35	International	Archer	12.3	2.53	0.31	https://archerx.com.au	2020-02-19
36	International	Lincoln Minerals	15.1	2.2	0.33	https://www.lincolnminerals.com.au/	2020-02-19
37	International	Northern graphite	1.7	69.8	1.61	http://www.northerngraphite.com/	2020-02-19
38	International	StratMin	5.2	5.7	0.23	https://sites.google.com/site/stratminglobalresource/	2020-02-19
39	International	Flinders Resources	10.2	2.8	0.3	https://leadingedgematerials.com/woxna-graphite/	2020-02-19
40	International	Mason graphite	27.8	4.7	1.3	http://masongraphite.com/	2020-02-19
41	International	Nextsource materials	6.4	141.28	9.02	http://www.nextsourcematerials.com/graphite/molo-graphite-project/	2020-02-19
42	International	Fokus graphite	15.13	7.87	1.19	http://www.focusgraphite.com/	2020-02-19
43	International	Strategic energy resources	9.4	4.3	0.58	https://www.strategicenergy.com.au/	2020-02-19
44	International	Berkwood	17	1.76	0.31	https://berkwoodresources.com/	2020-02-19
45	International	Beowulf	4.5	19.3	0.87	https://beowulfmining.com/projects/fennoscandian-finland-graphite/aitolampi/	2020-02-23

## Sheet: Jennestad drill holes collar
HOLE_ID	year	EASTING	NORTHING	ELEVATION	TOTAL DEPTH	AZIMUTH	DIP	START DATE	END DATE	Positioning	Az measure
JENDD13001	2013	510014	7.62492e+06	121.755	102.1	139.71	-49	28.3.2013	31.3.2013	DPOS GPS	Mag. compass
JENDD13003	2013	510074	7.62504e+06	138.9	143.2	145.86	-49	13.4.2013	14.4.2013	DPOS GPS	Mag. compass
JENDD13004	2013	510229	7.62514e+06	122.511	118.5	149.85	-50	13.4.2013	14.4.2013	DPOS GPS	Mag. compass
JENDD13008	2013	510456	7.62528e+06	100.915	105.8	183.96	-50	13.4.2013	14.4.2013	DPOS GPS	Mag. compass
JENDD13009	2013	510801	7.62538e+06	86.985	109.5	164.29	-48	13.4.2013	14.4.2013	DPOS GPS	Mag. compass
JENDD13010	2013	510692	7.62534e+06	104.348	69.2	151.09	-50	13.4.2013	14.4.2013	DPOS GPS	Casing top and bottom DPOS GPS point
JENDD13012	2013	510832	7.6254e+06	85.543	99.2	159.13	-50	13.4.2013	14.4.2013	DPOS GPS	Mag. compass
coordinates in UTM sone 33N

## Sheet: Jennesta drill hole geology
HOLE_ID	L_FROM	L_TO	INTERVAL	LITH_CODE	DESCRIPTION
JENDD13001	0	6.2	6.2	OVB	Overburden
JENDD13001	6.2	6.7	0.5	FMS	Greyish white fsp-qtz rich schist, fine grained. Trace graphite, trace pyrite. Strongly broken rock
JENDD13001	6.7	10.95	4.25	GSH	Greyish white graphite schist, Fine grained. Gneisic with qtz-fsp rich bands alternating with graphitic bands. In places massive flake graphite, broken rock
JENDD13001	10.95	11.2	0.25	PEG	Greyish white pegmatite, trace graphite flakes
JENDD13001	11.2	12	0.8	PGN	Greenish grey pyroxene, fsp and biotite rich gneiss, fine grained. Trace graphite flakes scattered in groundmass
JENDD13001	12	12.25	0.25	PEG	Greyish white pegmatite, trace graphite flakes
JENDD13001	12.25	12.5	0.25	PGN	Greenish grey pyroxene, fsp and biotite rich gneiss, fine grained. Trace graphite flakes scattered in groundmass
JENDD13001	12.5	12.85	0.35	PEG	Greyish white pegmatite, trace graphite flakes
JENDD13001	12.85	20.55	7.7	PGN	Greenish grey pyroxene, fsp and biotite rich gneiss, fine grained. Trace graphite flakes scattered in groundmass
JENDD13001	20.55	22.4	1.85	GSH	Greyish white graphite schist, Fine grained. Gneisic with qtz-fsp rich bands alternating with graphitic bands. In places massive flake graphite, broken rock
JENDD13001	22.85	27.4	4.55	PGN	Greenish grey pyroxene, fsp and biotite rich gneiss, fine grained. Trace graphite flakes scattered in groundmass
JENDD13001	27.4	29	1.6	GSH	Greyish white graphite schist, Fine grained. Gneisic with qtz-fsp rich bands alternating with graphitic bands. In places massive flake graphite, broken rock
JENDD13001	29	40.5	11.5	PGN	Greenish grey pyroxene, fsp and biotite rich gneiss alternating wit greyish white pegmatites Trace graphite flakes scattered in groundmass
JENDD13001	40.5	41.15	0.65	PEG	Greyish white pegmatite, trace graphite flakes
JENDD13001	41.15	42.45	1.3	GSH	Greyish white graphite schist, Fine grained. Gneisic with qtz-fsp rich bands alternating with graphitic bands. In places massive flake graphite, broken rock
JENDD13001	42.45	50.75	8.3	PGN	Greenish grey pyroxene, fsp and biotite rich gneiss alternating wit greyish white pegmatites Trace graphite flakes scattered in groundmass
JENDD13001	50.75	53.3	2.55	GSH	Greyish white graphite schist, Fine grained. Gneisic with qtz-fsp rich bands alternating with graphitic bands. In places massive flake graphite, broken rock
JENDD13001	53.3	62.15	8.85	PGN	Greenish grey pyroxene, fsp and biotite rich gneiss alternating wit greyish white pegmatites Trace graphite flakes scattered in groundmass
JENDD13001	62.15	67.1	4.95	GSH	Greyish white graphite schist, Fine grained. Gneisic with qtz-fsp rich bands alternating with graphitic bands. In places massive flake graphite, broken rock
JENDD13001	67.1	67.4	0.3	PEG	Greyish white pegmatite, trace graphite flakes
JENDD13001	67.4	69.85	2.45	GSH	Greyish white graphite schist, Fine grained. Gneisic with qtz-fsp rich bands alternating with graphitic bands. In places massive flake graphite, broken rock
JENDD13001	69.85	70.75	0.9	PGN	Greenish grey pyroxene, fsp and biotite rich gneiss. Greenish spots, most likely pyroxene? Trace graphite flakes scattered in groundmass
JENDD13001	70.75	71	0.25	GSH	Greyish white graphite schist, Fine grained. Gneisic with qtz-fsp rich bands alternating with graphitic bands. In places massive flake graphite, broken rock
JENDD13001	71	71.4	0.4	PEG	Greyish white pegmatite, trace graphite flakes
JENDD13001	71.4	71.6	0.2	GSH	Greyish white graphite schist, Fine grained. Gneisic with qtz-fsp rich bands alternating with graphitic bands. In places massive flake graphite, broken rock
JENDD13001	71.6	73.35	1.75	PGN	Greenish grey pyroxene, fsp and biotite rich gneiss. Greenish spots, most likely pyroxene? Trace graphite flakes scattered in groundmass
JENDD13001	73.35	74.8	1.45	GSH	Greyish white graphite schist, Fine grained. Gneisic with qtz-fsp rich bands alternating with graphitic bands. In places massive flake graphite, broken rock
JENDD13001	74.8	75.1	0.3	PEG	Greyish white pegmatite, trace graphite flakes
JENDD13001	75.1	76.8	1.7	PGN	Greenish grey pyroxene, fsp and biotite rich gneiss. Moderate graphite flakes scattered in groundmass, at times as graphite rich bands.
JENDD13001	76.8	77.15	0.35	GSH	Greyish white graphite schist, Fine grained. Gneisic with qtz-fsp rich bands alternating with graphitic bands. In places massive flake graphite, broken rock
JENDD13001	77.15	83.7	6.55	PGN	Greenish grey pyroxene, fsp and biotite rich gneiss. Moderate graphite flakes scattered in groundmass, at times as graphite rich bands.
JENDD13001	83.7	85.8	2.1	BX	Pinkish grey graphite infilled pegmatite breccia, common irregular carbonate veinlets
JENDD13001	85.8	88.6	2.8	PGN	Greenish grey pyroxene, fsp and biotite rich gneiss. Trace graphite flakes scattered in groundmass
JENDD13001	88.6	88.95	0.35	GSH	Greyish white graphite schist, Fine grained. Gneisic with qtz-fsp rich bands alternating with graphitic bands. In places massive flake graphite, broken rock
JENDD13001	88.95	90.8	1.85	PGN	Greenish grey pyroxene, fsp and biotite rich gneiss. Moderate graphite flakes scattered in groundmass.
JENDD13001	90.8	91.4	0.6	GSH	Greyish white graphite schist, Fine grained. Gneisic with qtz-fsp rich bands alternating with graphitic bands. In places massive flake graphite.
JENDD13001	91.4	92.75	1.35	PEG	Pinkish grey brecciated pegmatite, graphite infillments at time.
JENDD13001	92.75	94.55	1.8	GSH	Grey massive graphite schist
JENDD13001	94.55	102.1	7.55	PGN	Greenish grey pyroxene, fsp and biotite rich gneiss. Moderate graphite flakes scattered in groundmass, at times as graphite rich bands and brecciated.
JENDD13003	0	1.4	1.4	OVB	Overburden
JENDD13003	1.4	7.85	6.35	FMS	Greyblue felspar mica schist. Different intensity of biotite gives different colora and intensity of foliation
JENDD13003	7.85	9.95	2.1	PGN	Mixed unit. Pyroxene gneiss with some minor sections of pegmatite or feldspar mica schist. The structure changes from massive, breccited and foliated.
JENDD13003	9.95	11.75	1.8	FMS	Greyblue felspar mica schist. Different intensity of biotite gives different colora and intensity of foliation
JENDD13003	11.75	12.1	0.35	PEG	Coars grained pegmatite
JENDD13003	12.1	12.2	0.1	PEG	Dark unit again but breccaited with carbonate vn
JENDD13003	12.2	29.15	16.95	PGN	Pyroxene gneiss with some minor sections of pegmatite or feldspar mica schist. The structure changes from massive, breccited and foliated. Weakly magnetic at some places
JENDD13003	29.15	29.35	0.2	GSH	Graphite schist with moderate amounts of graphite
JENDD13003	29.35	31.1	1.75	FMS	Visible graphite grains in matrix
JENDD13003	31.1	31.35	0.25	GSH	Graphite schist with strong amounts of graphite
JENDD13003	31.35	31.95	0.6	FMS	Visible graphite grains in matrix
JENDD13003	31.95	65.3	33.35	PGN	Pyroxene gneiss with some minor sections of pegmatite or feldspar mica schist. The structure changes from massive, breccited and foliated. Weakly magnetic at some places. A greenish section is present, possible chlorite altreration
JENDD13003	65.3	65.5	0.2	PEG	Coars grained pegmatite
JENDD13003	65.5	68.2	2.7	PGN	Slightly green colored PGN, posiible chlorite altered?
JENDD13003	68.2	73.3	5.1	FMS	Large grains of biotite
JENDD13003	73.3	74.6	1.3	PEG	Pyroxene gneiss with some minor sections of pegmatite or feldspar mica schist. The structure changes from massive, breccited and foliated. Weakly magnetic at some places. A greenish section is present, possible chlorite altreration
JENDD13003	74.6	74.9	0.3	FMS	Fine grained, less biotite than in previous sections
JENDD13003	74.9	75.85	0.95	PEG	Pyroxene gneiss with some minor sections of pegmatite or feldspar mica schist. The structure changes from massive, breccited and foliated. Weakly magnetic at some places. A greenish section is present, possible chlorite altreration
JENDD13003	75.85	77.45	1.6	FMS
JENDD13003	77.45	77.95	0.5	PGN
JENDD13003	77.95	78.25	0.3	PEG	Coars grained pegmatite
JENDD13003	78.25	79.3	1.05	PGN	Possible contain dark graphite?
JENDD13003	79.3	81.25	1.95	FMS	Greyblue felspar mica schist. Different intensity of biotite gives different colora and intensity of foliation
JENDD13003	81.25	82.35	1.1	PEG	Coars grained pegmatite
JENDD13003	82.35	84.1	1.75	FMS	Greyblue felspar mica schist. Different intensity of biotite gives different colora and intensity of foliation. Some of the bands consit of Pyrite and pyrrhotite
JENDD13003	84.1	84.25	0.15	PEG	Coars grained pegmatite
JENDD13003	84.25	85.5	1.25	FMS	Greyblue felspar mica schist. Different intensity of biotite gives different colora and intensity of foliation. Some of the bands consit of Pyrite and pyrrhotite
JENDD13003	85.5	85.7	0.2	PEG	Coars grained pegmatite
JENDD13003	85.7	89.6	3.9	FMS	Greyblue felspar mica schist. Different intensity of biotite gives different colora and intensity of foliation. Some of the bands consit of Pyrite and pyrrhotite
JENDD13003	89.6	108.55	0.3	PGN	Crushed pyroxene gneiss
JENDD13003	108.55	111.6	3.05	FMS	Greyblue felspar mica schist. Different intensity of biotite gives different colora and intensity of foliation. Some of the bands consit of Pyrite and pyrrhotite
JENDD13003	111.6	113.1	1.5	GSH	Graphite schist
JENDD13003	113.1	120.65	7.55	FMS	Greyblue felspar mica schist. Different intensity of biotite gives different colora and intensity of foliation. Some of the bands consit of Pyrite and pyrrhotite
JENDD13003	122.4	123.45	1.05	PEG	Greyblue felspar mica schist. Different intensity of biotite gives different colora and intensity of foliation. Some of the bands consit of Pyrite and pyrrhotite
JENDD13003	123.45	125.5	2.05	GSH	Graphite schist
JENDD13003	125.5	127.45	1.95	PGN
JENDD13003	127.45	143.2	15.75	FMS
JENDD13004	0	1.3	1.3	OVB	Overburden
JENDD13004	1.3	6.15	4.85	PEG	Whiteish-Bluegrey mediusm grained sized pematite with very low conten of graphite
JENDD13004	6.15	9.55	3.4	FMS	Bluegrey feldspar dominated unit. Fine grained, traces of graphite
JENDD13004	9.55	12.5	2.95	PEG	Whiteish-Bluegrey mediusm grained sized pematite with very low conten of graphite
JENDD13004	12.5	14.6	2.1	PGN	Fine grained pyroxene gneiss witj high conten of dark minerals (Py+Bi). Appears to contain moderate amounts of graphite
JENDD13004	14.6	16.05	1.45	FMS	Bluegrey feldspar and quartz dominated unit. Fine grained, traces to possible moderate aomunts of graphite
JENDD13004	16.05	17	0.95	GSH	Graphite schist with high content of graphite, sharp boundary
JENDD13004	17	20.45	7.45	PGN	Fine grained pyroxene gneiss with high conten of dark minerals (Py+Bi).
JENDD13004	21.35	21.7	0.25	GSH	Graphite schist with high content of graphite, sharp boundary
JENDD13004	21.7	22.2	0.5	PGN	PGN with high content of albite?
JENDD13004	22.2	23.6	1.4	GSH	Brecciated graphite schist , sharp boundary
JENDD13004	23.6	35.65	12.05	PGN	Fine grained pyroxene gneiss with high conten of dark minerals (Py+Bi). Variation in graphite content. From traces to moderate in some sections
JENDD13004	35.65	36.15	0.5	FMS	Bluegrey feldspar and quartz dominated unit. Fine grained, traces to possible moderate aomunts of graphite
JENDD13004	36.15	45.3	9.15	PGN	Fine grained pyroxene gneiss with high conten of dark minerals (Py+Bi). Variation in graphite content. From traces to moderate in some sections
JENDD13004	45.3	46.65	1.35	GSH	Graphite schist with high content of graphite
JENDD13004	46.65	58.4	11.75	PGN	Fine grained pyroxene gneiss with high conten of dark minerals (Py+Bi). Variation in graphite content. From traces to moderate in some sections
JENDD13004	58.4	59.65	1.25	GSH	Graphite schist with high content of graphite
JENDD13004	59.65	64.8	5.15	PGN	Fine grained pyroxene gneiss with high conten of dark minerals (Py+Bi). Variation in graphite content. From traces to moderate in some sections
JENDD13004	64.8	65.6	0.8	PEG	Weathered pegmatite
JENDD13004	65.6	70.3	4.7	GSH	Graphite schist with high content of graphite
JENDD13004	70.3	83.85	13.55	PGN	Fine grained pyroxene gneiss with high conten of dark minerals (Py+Bi). Variation in graphite content. From traces to moderate in some sections. Pyrite present as small clusters at cracks
JENDD13004	83.85	84.8	0.95	PEG	Coars grained pematite with traces of grphite
JENDD13004	84.8	87.5	2.7	GSH	Graphite schist with high content of graphite
JENDD13004	87.5	91.75	4.25	PGN	Fine grained pyroxene gneiss with high conten of dark minerals (Py+Bi). Variation in graphite content. From traces to moderate in some sections
JENDD13004	91.75	98.35	6.6	GSH	Graphite schist with high content of graphite. High amounts of pyrite is present as veins. Intensity varies from high to low.
JENDD13004	98.35	113.25	14.9	PGN	Fine grained pyroxene gneiss with high conten of dark minerals (Py+Bi). Variation in graphite content. From traces to moderate in some sections. Pyrite slusters found near cracks
JENDD13004	113.25	114.3	1.05	PEG	Coars grained pematite with traces of grphite
JENDD13004	114.3	118.5	4.2	PGN	Fine grained pyroxene gneiss with high conten of dark minerals (Py+Bi). Variation in graphite content. From traces to moderate in some sections
JENDD13008	0	1.6	1.6	OVB	Overburden
JENDD13008	1.6	20.4	18.8	PGN	Dark grey colored matrix with light grey-white minerals. At some sections a small red hard mineral is present (Garnet?) the light colored minerals appear to be carbonates. The unit is very magnetic, which could be explained by Magnetite. A light green semi transprent minerl is found which could be apatite.
JENDD13008	20.4	20.95	0.55	DOL	Light colored soft rock type. Fine grained
JENDD13008	20.95	44.4	23	PGN	Dark grey colored matrix with light grey-white minerals. At some sections a small red hard mineral is present (Garnet?) the light colored minerals appear to be carbonates. The unit is very magnetic, which could be explained by Magnetite. A light green semi transprent minerl is found which could be apatite. Albite is also present at some locations
JENDD13008	44.4	47.75	3.35	FMS	Intensity of biotite varies and gives darker or lighter color, and some of less foliation.
JENDD13008	47.75	48.15	0.4	PEG	Coarse grained light grey-blue grey pegmatite
JENDD13008	48.15	66.3	18.15	FMS	Intensity of biotite varies and gives darker or lighter color, and some of less foliation. Intensity of the banding increases towards the end of this unit
JENDD13008	66.3	67.1	0.8	DOL	Light colored soft rock type. Fine grained with apatite (green)and albite (red) some minor quartz might be present as well
JENDD13008	67.1	67.4	0.3	PGN	Very dark high amount of dark minerals. Have both carbonate and sulfide rich veins
JENDD13008	67.4	69.55	2.15	FMS	Intensity of biotite varies and gives darker or lighter color, and some of less foliation.
JENDD13008	69.55	70.7	1.15	PGN	Very dark high amount of dark minerals. Have both carbonate and sulfide rich veins
JENDD13008	70.7	71.65	0.95	PEG	Mixed unit with pegmatite and pyroxene gneiss
JENDD13008	71.65	81.4	9.75	FMS	Feldspar mica schist with sections of graphite
JENDD13008	81.4	81.8	0.4	DOL	white Light colored soft rock type. Some minor quartz might be present as well
JENDD13008	81.8	82.5	0.7	GSH	Graphite schist with breciation caused by carbonate?
JENDD13008	82.5	87.6	5.1	FMS	Feldspar mica schist
JENDD13008	87.6	91.15	3.55	GSH	Graphite schist with flakes and foliation structures visible
JENDD13008	91.15	94	2.85	FMS	Feldspar mica schist with sections of more or less banding
JENDD13008	94	96.55	2.55	GSH	Graphite schist with flakes, pyrite and pyrrhotite
JENDD13008	96.55	100.4	3.85	DOL	Light colored banded unit. Possible a gneiss? Band have different color such as, light grey, grey, pinkgrey, greengrey. Clast of a pink mineral is present, garnet? Unit is possible carbon rich. Fine grained. Locally small bands of graphite is seen,
JENDD13008	100.4	102.85	2.45	FMS	Feldspar mica schist with sections of more or less banding. Possible traces of graphite
JENDD13008	100.4	100.9	0.5	FMS	Layers of graphite
JENDD13008	102.85	105.8	2.95	PGN	Mixed unit with pegmatite and pyroxene gneiss
JENDD13010	0	1	1	OVB
JENDD13010	1	4.85	3.85	PGN	Pyroxene gneiss with magnetite
JENDD13010	4.85	5.05	0.2	PEG	Light pink in color, coars grained
JENDD13010	5.05	5.9	0.85	PGN	Pyroxene gneiss with magnetite
JENDD13010	5.9	7.05	1.15	PEG	Light pink in color, coars grained
JENDD13010	7.05	13.7	6.65	PGN	Pyroxene gneiss with magnetite
JENDD13010	13.7	19.15	5.45	PEG	Small amount of biotite is present. Appears that some minor carbonate is present
JENDD13010	19.15	29.6	5.45	PGN	Pyroxene gneiss with magnetite
JENDD13010	29.6	35.55	5.95	DOL	Blueish grey, fine- medium grained. Weak foliation present at some locations
JENDD13010	35.55	42.9	7.35	FMS	Graphite present as small band or in matrix. Not strong,b ut worht analysing
JENDD13010	42.9	43.55	0.65	GSH	Graphite schist, moderate amounts. Very small section of strong
JENDD13010	43.55	44.2	0.65	FMS	Amount of biotite varies and gives he unit color changes and changes in foliation intensity
JENDD13010	44.2	44.9	0.7	GSH	Graphite schist, strong section with some minor pyrite and carbonate
JENDD13010	44.9	46.45	1.55	DOL	Blueish grey, fine- medium grained. Weak foliation present at some locations
JENDD13010	46.45	66.6	20.15	FMS	Amount of biotite varies and gives he unit color changes and changes in foliation intensity
JENDD13010	66.6	67.6	1	PEG	Coars grained pegmatite
JENDD13010	67.6	68.7	1.1	FMS	Amount of biotite varies and gives he unit color changes and changes in foliation intensity
JENDD13010	68.7	69.1	0.4	PEG	Coars grained pegmatite
JENDD13010	69.1	69.2	0.1	FMS	Amount of biotite varies and gives he unit color changes and changes in foliation intensity
JENDD13012	0	0.5	0.5	OVB	Overburden
JENDD13012	0.5	29.95	29.45	PGN	Pyroxene gneiss, weakly magnetic throughout the section. Feldspar clast are present. Biotite rich
JENDD13012	29.95	31.6	1.65	PEG	Light pink felsic dominated with minor biotite. Looks like a granite
JENDD13012	31.6	49.2	17.6	PGN	Pyroxene gneiss, weakly magnetic throughout the section. Feldspar clast are present. Biotite rich. This section has clast of a pink mineral, albite? Light green vn are also present at cracks.
JENDD13012	49.2	49.35	0.15	PEG	White colored granite
JENDD13012	49.35	50.05	0.7	PGN	Pyroxene gneiss, weakly magnetic throughout the section. Feldspar clast are present. Biotite rich. This section has clast of a pink mineral, albite? Light green vn are also present at cracks.
JENDD13012	50.05	53.35	3.3	DOL	White blueish dolomite
JENDD13012	53.35	57.3	3.95	FMS	Feldspar mica schist with more feldspa than micas. Fine grained. Graphite present in matrix, can be seen in fresh surface
JENDD13012	57.3	58.65	1.35	GSH	Graphite schist, visible flakes
JENDD13012	58.65	59	0.35	FMS	Feldspar mica schist with more feldspa than micas. Fine grained. Graphite present in matrix, can be seen in fresh surface
JENDD13012	59	59.25	0.25	GSH	Graphite schist, visible flakes
JENDD13012	59.25	61.4	2.15	FMS	Feldspar mica schist with more feldspa than micas. Fine grained. Graphite present in matrix, can be seen in fresh surface
JENDD13012	61.4	62.9	1.5	PEG	Coarse grained albite rich pegmatite
JENDD13012	62.9	63	0.1	GSH	Graphite schist, visible flakes
JENDD13012	63	78	15	PGN	Pyroxene gneiss
JENDD13012	78	78.9	0.9	DOL	Dolomite
JENDD13012	78.9	88.7	9.8	FMS	Feldspar mica schist with more feldspa than micas. Fine grained. Graphite present in matrix, can be seen in fresh surface
JENDD13012	88.7	88.9	0.2	GSH	Graphite schist, visible flakes
JENDD13012	88.9	89.45	0.55	FMS	Feldspar mica schist with more feldspa than micas. Fine grained. Graphite present in matrix, can be seen in fresh surface
JENDD13012	89.45	90.3	0.85	GSH	Graphite schist, visible flakes
JENDD13012	90.3	99.2	8.9	FMS	Feldspar mica schist with more feldspa than micas. Fine grained. Graphite present in matrix, can be seen in fresh surface

## Sheet: jennestad drill hole assay
HOLE_ID	DEPTH_FROM	DEPTH_TO	INTERVAL	SAMPLE_NO	SAMPLE_TYPE	SAMPLE_SUB_TYPE	COMPANY	DATE_SAMPLED	TOTAL_C_%	INORGANIC_C_%	TC_%
JENDD13001	6.2	6.7	0.5	19182	HC		MOLAB AS	2013-04-07	0.65		0.65
JENDD13001	6.7	8	1.3	19183	HC		MOLAB AS	2013-04-07	5.47		5.47
JENDD13001	8	9	1	19184	HC		MOLAB AS	2013-04-07	3.56		3.56
JENDD13001	9	10	1	19185	HC		MOLAB AS	2013-04-07	0.88		0.88
JENDD13001	10	10.95	0.95	19186	HC		MOLAB AS	2013-04-07	3.77		3.77
JENDD13001	10.95	12	1.05	19187	HC		MOLAB AS	2013-04-07	0.05		0.05
JENDD13001	12	13	1	19188	HC		MOLAB AS	2013-04-07	0.09		0.09
JENDD13001	18.55	19.55	1	19189	HC		MOLAB AS	2013-04-07	0.14		0.14
JENDD13001	19.55	20.55	1	19191	HC		MOLAB AS	2013-04-07	4.42		4.42
JENDD13001	20.55	21.7	1.15	19192	HC		MOLAB AS	2013-04-07	4.98		4.98
JENDD13001	21.7	22.4	0.7	19193	HC		MOLAB AS	2013-04-07	1.26		1.26
JENDD13001	22.4	22.85	0.45	19194	HC		MOLAB AS	2013-04-07	9.48		9.48
JENDD13001	22.85	24	1.15	19195	HC		MOLAB AS	2013-04-07	0.12		0.12
JENDD13001	24	25	1	19196	HC		MOLAB AS	2013-04-07	0.07		0.07
JENDD13001	25	26	1	19197	HC		MOLAB AS	2013-04-07	0.2		0.2
JENDD13001	26	27.4	1.4	19198	HC		MOLAB AS	2013-04-07	0.68		0.68
JENDD13001	27.4	28	0.6	19199	HC		MOLAB AS	2013-04-07	6.4		6.4
JENDD13001	28	29	1	19201	HC		MOLAB AS	2013-04-07	3.49		3.49
JENDD13001	29	30	1	19202	HC		MOLAB AS	2013-04-07	0.16		0.16
JENDD13001	30	31	1	19203	HC		MOLAB AS	2013-04-07	0.12		0.12
JENDD13001	39.5	40.5	1	19204	HC		MOLAB AS	2013-04-07	0.09		0.09
JENDD13001	40.5	41.15	0.65	19206	HC		MOLAB AS	2013-04-07	0.08		0.08
JENDD13001	41.15	42.05	0.9	19207	HC		MOLAB AS	2013-04-07	2.2		2.2
JENDD13001	42.05	42.45	0.4	19208	HC		MOLAB AS	2013-04-07	11.41	0.13	11.28
JENDD13001	42.45	43.45	1	19209	HC		MOLAB AS	2013-04-07	0.26		0.26
JENDD13001	43.45	44.45	1	19211	HC		MOLAB AS	2013-04-07	0.04		0.04
JENDD13001	44.45	45.45	1	19212	HC		MOLAB AS	2013-04-07	0.03		0.03
JENDD13001	45.45	45.7	0.25	19213	HC		MOLAB AS	2013-04-07	0.06		0.06
JENDD13001	45.7	47	1.3	19214	HC		MOLAB AS	2013-04-07	0.06		0.06
JENDD13001	47	48	1	19215	HC		MOLAB AS	2013-04-07	0.07		0.07
JENDD13001	48	49	1	19216	HC		MOLAB AS	2013-04-07	0.06		0.06
JENDD13001	49	50	1	19217	HC		MOLAB AS	2013-04-07	0.4		0.4
JENDD13001	50	50.75	0.75	19218	HC		MOLAB AS	2013-04-07	0.12		0.12
JENDD13001	50.75	51.5	0.75	19219	HC		MOLAB AS	2013-04-07	1.45		1.45
JENDD13001	51.5	51.9	0.4	19221	HC		MOLAB AS	2013-04-07	17.95	0.23	17.72
JENDD13001	51.9	53.3	1.4	19222	HC		MOLAB AS	2013-04-07	8.78	0.15	8.63
JENDD13001	53.3	54.3	1	19223	HC		MOLAB AS	2013-04-07	0.11		0.11
JENDD13001	54.3	55.3	1	19224	HC		MOLAB AS	2013-04-07	0.14		0.14
JENDD13001	55.3	56.3	1	19225	HC		MOLAB AS	2013-04-07	0.06		0.06
JENDD13001	56.3	57.3	1	19226	HC		MOLAB AS	2013-04-07	0.07		0.07
JENDD13001	57.3	58.3	1	19227	HC		MOLAB AS	2013-04-07	0.1		0.1
JENDD13001	58.3	59.3	1	19228	HC		MOLAB AS	2013-04-07	0.1		0.1
JENDD13001	59.3	60.5	1.2	19229	HC		MOLAB AS	2013-04-07	0.07		0.07
JENDD13001	60.5	60.9	0.4	19232	HC		MOLAB AS	2013-04-07	0.43		0.43
JENDD13001	60.9	62.15	1.25	19233	HC		MOLAB AS	2013-04-07	1.43		1.43
JENDD13001	62.15	63	0.85	19234	HC		MOLAB AS	2013-04-07	4.32		4.32
JENDD13001	63	64	1	19235	HC		MOLAB AS	2013-04-07	0.83		0.83
JENDD13001	64	64.6	0.6	19236	HC		MOLAB AS	2013-04-07	1.75		1.75
JENDD13001	64.6	65.15	0.55	19237	HC		MOLAB AS	2013-04-07	3.88		3.88
JENDD13001	65.15	66	0.85	19238	HC		MOLAB AS	2013-04-07	3.53		3.53
JENDD13001	66	67.1	1.1	19239	HC		MOLAB AS	2013-04-07	0.29		0.29
JENDD13001	67.1	67.4	0.3	19241	HC		MOLAB AS	2013-04-07	0.1		0.1
JENDD13001	67.4	68	0.6	19242	HC		MOLAB AS	2013-04-07	0.09		0.09
JENDD13001	68	69	1	19243	HC		MOLAB AS	2013-04-07	0.07		0.07
JENDD13001	69	69.85	0.85	19244	HC		MOLAB AS	2013-04-07	0.08		0.08
JENDD13001	69.85	70.75	0.9	19245	HC		MOLAB AS	2013-04-07	0.03		0.03
JENDD13001	70.75	71	0.25	19246	HC		MOLAB AS	2013-04-07	0.07		0.07
JENDD13001	71	71.4	0.4	19247	HC		MOLAB AS	2013-04-07	0.08		0.08
JENDD13001	71.4	71.6	0.2	19248	HC		MOLAB AS	2013-04-07	0.08		0.08
JENDD13001	71.6	73.35	1.75	19249	HC		MOLAB AS	2013-04-07	0.09		0.09
JENDD13001	73.35	74	0.65	19251	HC		MOLAB AS	2013-04-07	0.17		0.17
JENDD13001	74	74.8	0.8	19252	HC		MOLAB AS	2013-04-07	0.06		0.06
JENDD13001	74.8	75.1	0.3	19253	HC		MOLAB AS	2013-04-07	0.12		0.12
JENDD13001	75.1	76	0.9	19254	HC		MOLAB AS	2013-04-07	0.11		0.11
JENDD13001	76	76.8	0.8	19256	HC		MOLAB AS	2013-04-07	0.07		0.07
JENDD13001	76.8	77.15	0.35	19257	HC		MOLAB AS	2013-04-07	0.15		0.15
JENDD13001	77.15	78	0.85	19258	HC		MOLAB AS	2013-04-07	0.42		0.42
JENDD13001	78	79	1	19259	HC		MOLAB AS	2013-04-07	0.25		0.25
JENDD13001	79	80	1	19261	HC		MOLAB AS	2013-04-07	0.17		0.17
JENDD13001	80	81	1	19262	HC		MOLAB AS	2013-04-07	0.71		0.71
JENDD13001	81	82	1	19263	HC		MOLAB AS	2013-04-07	0.09		0.09
JENDD13001	82	83	1	19264	HC		MOLAB AS	2013-04-07	0.29		0.29
JENDD13001	83	83.7	0.7	19265	HC		MOLAB AS	2013-04-07	0.09		0.09
JENDD13001	83.7	84.7	1	19266	HC		MOLAB AS	2013-04-08	0.91		0.91
JENDD13001	84.7	85.8	1.1	19267	HC		MOLAB AS	2013-04-08	0.19		0.19
JENDD13001	85.8	87	1.2	19268	HC		MOLAB AS	2013-04-08	0.08		0.08
JENDD13001	87	88	1	19269	HC		MOLAB AS	2013-04-08	0.1		0.1
JENDD13001	88	88.6	0.6	19271	HC		MOLAB AS	2013-04-08	0.08		0.08
JENDD13001	88.6	88.95	0.35	19272	HC		MOLAB AS	2013-04-08	0.4		0.4
JENDD13001	88.95	90	1.05	19273	HC		MOLAB AS	2013-04-08	0.17		0.17
JENDD13001	90	90.8	0.8	19274	HC		MOLAB AS	2013-04-08	2.01		2.01
JENDD13001	90.8	91.4	0.6	19275	HC		MOLAB AS	2013-04-08	7.63		7.63
JENDD13001	91.4	92.75	1.35	19276	HC		MOLAB AS	2013-04-08	0.28		0.28
JENDD13001	92.75	93.75	1	19277	HC		MOLAB AS	2013-04-08	9.66	0.19	9.47
JENDD13001	93.75	94.55	0.8	19278	HC		MOLAB AS	2013-04-08	1.61		1.61
JENDD13001	94.55	95.55	1	19279	HC		MOLAB AS	2013-04-08	0.1		0.1
JENDD13001	95.55	96	0.45	19282	HC		MOLAB AS	2013-04-08	0.17		0.17
JENDD13001	96	97	1	19283	HC		MOLAB AS	2013-04-08	0.1		0.1
JENDD13001	97	98	1	19284	HC		MOLAB AS	2013-04-08	0.14		0.14
JENDD13001	98	99	1	19285	HC		MOLAB AS	2013-04-08	0.13		0.13
JENDD13001	99	100	1	19286	HC		MOLAB AS	2013-04-08	0.12		0.12
JENDD13001	100	101	1	19287	HC		MOLAB AS	2013-04-08	0.09		0.09
JENDD13001	101	102.1	1.1	19288	HC		MOLAB AS	2013-04-08	0.15		0.15
JENDD13003	26.95	27.95	1	20796		HC	MOLAB AS	2013-04-21	0.08		0.08
JENDD13003	27.95	28.4	0.45	20797				2013-04-21	1.1		1.1
JENDD13003	28.4	29.15	0.75	20798		HC	MOLAB AS	2013-04-21	0.85		0.85
JENDD13003	29.15	29.35	0.2	20799				2013-04-21	14.64	0.12	14.52
JENDD13003	29.35	29.85	0.5	20800				2013-04-21	0.27		0.27
JENDD13003	29.85	30	0.15	20801				2013-04-21	5.93	-0.1	5.93
JENDD13003	30	31.1	1.1	20802		HC	MOLAB AS	2013-04-21	0.59		0.59
JENDD13003	31.1	31.35	0.25	20804		HC	MOLAB AS	2013-04-21	12.12	-0.1	12.12
JENDD13003	31.35	31.95	0.6	20806		HC	MOLAB AS	2013-04-21	1.36		1.36
JENDD13003	31.95	32.95	1	20807		HC	MOLAB AS	2013-04-21	0.07		0.07
JENDD13003	75.85	76.35	0.5	20808		HC	MOLAB AS	2013-04-21	0.05		0.05
JENDD13003	76.35	77.05	0.7	20809		HC	MOLAB AS	2013-04-21	0.05		0.05
JENDD13003	77.05	77.45	0.4	20810		HC	MOLAB AS	2013-04-21	0.08		0.08
JENDD13003	77.45	77.95	0.5	20811		HC	MOLAB AS	2013-04-21	0.1		0.1
JENDD13003	78.25	79.25	1	20812		HC	MOLAB AS	2013-04-21	0.1		0.1
JENDD13003	79.25	80.25	1	20814		HC	MOLAB AS	2013-04-21	0.05		0.05
JENDD13003	95.15	96.15	1	20815		HC	MOLAB AS	2013-04-21	0.11		0.11
JENDD13003	96.15	96.8	0.65	20816		HC	MOLAB AS	2013-04-21	8.02	-0.1	8.02
JENDD13003	96.8	97	0.2	20817		HC	MOLAB AS	2013-04-21	4.93	-0.1	4.93
JENDD13003	97	98	1	20818		HC	MOLAB AS	2013-04-21	0.89		0.89
JENDD13003	98	99.65	1.65	20819		HC	MOLAB AS	2013-04-21	1.71		1.71
JENDD13003	99.65	99.9	0.25	20820		HC	MOLAB AS	2013-04-21	7.59	-0.1	7.59
JENDD13003	99.9	100.9	1	20821		HC	MOLAB AS	2013-04-21	0.08		0.08
JENDD13003	108.15	109.15	1	20823		HC	MOLAB AS	2013-04-21	0.14		0.14
JENDD13003	109.15	109.95	0.8	20824		HC	MOLAB AS	2013-04-21	2.59	-0.1	2.59
JENDD13003	109.95	111.1	1.15	20825		HC	MOLAB AS	2013-04-21	0.09		0.09
JENDD13003	111.1	111.35	0.25	20826		HC	MOLAB AS	2013-04-21	5.13	-0.1	5.13
JENDD13003	111.35	111.6	0.25	20827		HC	MOLAB AS	2013-04-21	11	-0.1	11
JENDD13003	111.6	112.6	1	20828		HC	MOLAB AS	2013-04-21	22.07	-0.1	22.07
JENDD13003	112.6	113.1	0.5	20831		HC	MOLAB AS	2013-04-21	13.13	0.12	13.01
JENDD13003	113.1	113.6	0.5	20832		HC	MOLAB AS	2013-04-21	8.49	0.82	7.67
JENDD13003	113.6	114.35	0.75	20833		HC	MOLAB AS	2013-04-21	0.29		0.29
JENDD13003	114.35	114.6	0.25	20834		HC	MOLAB AS	2013-04-21	7.33	-0.1	7.33
JENDD13003	114.6	115.6	1	20835		HC	MOLAB AS	2013-04-21	0.14		0.14
JENDD13003	115.6	116.6	1	20836		HC	MOLAB AS	2013-04-21	0.19		0.19
JENDD13003	120.85	121.65	0.8	20837		HC	MOLAB AS	2013-04-21	0.05		0.05
JENDD13003	121.65	122.4	0.75	20838		HC	MOLAB AS	2013-04-21	7.4	-0.1	7.4
JENDD13003	123.45	124.45	1	20839		HC	MOLAB AS	2013-04-21	1.21		1.21
JENDD13003	124.45	125.5	1.05	20841		HC	MOLAB AS	2013-04-21	16.72	0.16	16.56
JENDD13003	125.5	126.5	1	20842		HC	MOLAB AS	2013-04-21	0.34		0.34
JENDD13003	133.05	134.05	1	20843		HC	MOLAB AS	2013-04-21	0.18		0.18
JENDD13003	134.05	134.5	0.45	20844		HC	MOLAB AS	2013-04-21	0.46		0.46
JENDD13003	134.5	135.5	1	20845		HC	MOLAB AS	2013-04-21	0.16		0.16
JENDD13004	11.35	11.5	0.15	19382		HC	MOLAB AS	2013-04-11	0.06		0.06
JENDD13004	11.5	12.5	1	19383		HC	MOLAB AS	2013-04-11	0.05		0.05
JENDD13004	12.5	13.5	1	19384		HC	MOLAB AS	2013-04-11	0.04		0.04
JENDD13004	13.5	14.6	1.1	19385		HC	MOLAB AS	2013-04-11	1.41		1.41
JENDD13004	14.6	15.6	1	19386		HC	MOLAB AS	2013-04-11	0.21		0.21
JENDD13004	15.6	16.05	0.45	19387		HC	MOLAB AS	2013-04-11	0.34		0.34
JENDD13004	16.05	17	0.95	19388		HC	MOLAB AS	2013-04-11	12.5		12.5
JENDD13004	17	18	1	19389		HC	MOLAB AS	2013-04-11	0.07		0.07
JENDD13004	18	19	1	19391		HC	MOLAB AS	2013-04-11	0.05		0.05
JENDD13004	19	20	1	19392		HC	MOLAB AS	2013-04-11	0.03		0.03
JENDD13004	20	20.45	0.45	19393		HC	MOLAB AS	2013-04-11	0.09		0.09
JENDD13004	20.45	21.45	1	19394		HC	MOLAB AS	2013-04-11	0.46		0.46
JENDD13004	21.45	21.7	0.25	19395		HC	MOLAB AS	2013-04-11	10.07	0.12	9.95
JENDD13004	21.7	22.2	0.5	19396		HC	MOLAB AS	2013-04-11	1.38		1.38
JENDD13004	22.2	23.2	1	19397		HC	MOLAB AS	2013-04-11	10.52	-0.1	10.52
JENDD13004	23.2	23.6	0.4	19398		HC	MOLAB AS	2013-04-11	0.09		0.09
JENDD13004	23.6	24.6	1	19399		HC	MOLAB AS	2013-04-11	0.04		0.04
JENDD13004	24.6	25.6	1	19401		HC	MOLAB AS	2013-04-11	0.08		0.08
JENDD13004	25.6	26.1	0.5	19402		HC	MOLAB AS	2013-04-11	0.08		0.08
JENDD13004	26.1	27	0.9	19403		HC	MOLAB AS	2013-04-11	0.4		0.4
JENDD13004	27	28	1	19404		HC	MOLAB AS	2013-04-11	3.56	0.14	3.42
JENDD13004	28	29	1	19406		HC	MOLAB AS	2013-04-11	0.17		0.17
JENDD13004	43.3	44.3	1	19407		HC	MOLAB AS	2013-04-11	0.08		0.08
JENDD13004	44.3	45.3	1	19408		HC	MOLAB AS	2013-04-11	0.04		0.04
JENDD13004	45.3	46	0.7	19409		HC	MOLAB AS	2013-04-11	4.08	-0.1	4.08
JENDD13004	46	46.65	0.65	19411		HC	MOLAB AS	2013-04-11	0.16		0.16
JENDD13004	55	55.95	0.95	19414		HC	MOLAB AS	2013-04-11	0.05		0.05
JENDD13004	55.95	56.25	0.3	19415		HC	MOLAB AS	2013-04-11	0.03		0.03
JENDD13004	56.25	57.1	0.85	19416		HC	MOLAB AS	2013-04-11	0.04		0.04
JENDD13004	57.1	57.85	0.75	19417		HC	MOLAB AS	2013-04-11	0.04		0.04
JENDD13004	57.85	58.4	0.55	19418		HC	MOLAB AS	2013-04-11	1.03		1.03
JENDD13004	58.4	59	0.6	19419		HC	MOLAB AS	2013-04-11	1.26		1.26
JENDD13004	59	59.65	0.65	19421		HC	MOLAB AS	2013-04-11	8.87	-0.1	8.87
JENDD13004	59.65	60.7	1.05	19422		HC	MOLAB AS	2013-04-11	0.26		0.26
JENDD13004	60.7	61.7	1	19423		HC	MOLAB AS	2013-04-11	0.09		0.09
JENDD13004	61.7	62.7	1	19424		HC	MOLAB AS	2013-04-11	0.37		0.37
JENDD13004	62.7	63.7	1	19425		HC	MOLAB AS	2013-04-11	0.07		0.07
JENDD13004	63.7	64.8	1.1	19426		HC	MOLAB AS	2013-04-11	0.43		0.43
JENDD13004	64.8	65.6	0.8	19427		HC	MOLAB AS	2013-04-11	1.44		1.44
JENDD13004	65.6	66.6	1	19428		HC	MOLAB AS	2013-04-11	13.71	0.15	13.56
JENDD13004	66.6	67.6	1	19429		HC	MOLAB AS	2013-04-11	7.29	0.16	7.13
JENDD13004	67.6	68.6	1	19432		HC	MOLAB AS	2013-04-11	9.24	0.15	9.09
JENDD13004	68.6	69.6	1	19433		HC	MOLAB AS	2013-04-11	4.28	0.16	4.12
JENDD13004	69.6	70.3	0.7	19434		HC	MOLAB AS	2013-04-11	1.21		1.21
JENDD13004	70.3	71.3	1	19435		HC	MOLAB AS	2013-04-11	0.14		0.14
JENDD13004	78.6	79.6	1	19445		HC	MOLAB AS	2013-04-11	0.07		0.07
JENDD13004	79.6	80.6	1	19446		HC	MOLAB AS	2013-04-11	1.14		1.14
JENDD13004	80.6	81.6	1	19447		HC	MOLAB AS	2013-04-11	3.34	0.12	3.22
JENDD13004	81.6	82.85	1.25	19448		HC	MOLAB AS	2013-04-11	0.17		0.17
JENDD13004	82.85	83.85	1	19449		HC	MOLAB AS	2013-04-11	10.01	0.22	9.79
JENDD13004	83.85	85.8	1	19452		HC	MOLAB AS	2013-04-11	18.69	-0.1	18.69
JENDD13004	85.8	86.8	1	19453		HC	MOLAB AS	2013-04-11	20.81	0.11	20.7
JENDD13004	86.8	87.5	0.7	19454		HC	MOLAB AS	2013-04-11	17.25	0.18	17.07
JENDD13004	87.5	88	0.5	19456		HC	MOLAB AS	2013-04-11	5.71	0.2	5.51
JENDD13004	88	89	1	19457		HC	MOLAB AS	2013-04-11	0.28		0.28
JENDD13004	89	90	1	19458		HC	MOLAB AS	2013-04-11	0.09		0.09
JENDD13004	90	91	1	19459		HC	MOLAB AS	2013-04-11	0.09		0.09
JENDD13004	91	91.75	0.75	19461		HC	MOLAB AS	2013-04-11	1.41		1.41
JENDD13004	91.75	92.8	1.05	19462		HC	MOLAB AS	2013-04-11	9.24	0.13	9.11
JENDD13004	92.8	93.8	1	19463		HC	MOLAB AS	2013-04-11	13.37	-0.1	13.37
JENDD13004	93.8	95.8	2	19464		HC	MOLAB AS	2013-04-11	28.93	0.16	28.77
JENDD13004	95.8	96.8	1	19465		HC	MOLAB AS	2013-04-11	9.46	0.11	9.35
JENDD13004	96.8	97.8	1	19466		HC	MOLAB AS	2013-04-11	16.36	0.11	16.25
JENDD13004	97.8	98.35	0.55	19467		HC	MOLAB AS	2013-04-11	18.22	0.13	18.09
JENDD13004	98.35	99.7	1.35	19468		HC	MOLAB AS	2013-04-11	1.45		1.45
JENDD13004	99.7	100.4	0.7	19469		HC	MOLAB AS	2013-04-11	0.03		0.03
JENDD13004	100.4	101.3	0.9	19471		HC	MOLAB AS	2013-04-11	0.16		0.16
JENDD13004	101.3	102.3	1	19472		HC	MOLAB AS	2013-04-11	0.06		0.06
JENDD13004	102.3	103.3	1	19473		HC	MOLAB AS	2013-04-11	0.05		0.05
JENDD13004	103.3	104.3	1	19474		HC	MOLAB AS	2013-04-11	0.04		0.04
JENDD13004	104.3	105.8	1.5	19475		HC	MOLAB AS	2013-04-11	0.05		0.05
JENDD13004	105.8	106.6	0.8	19476		HC	MOLAB AS	2013-04-11	12.29	0.21	12.08
JENDD13004	106.6	107.6	1	19477		HC	MOLAB AS	2013-04-11	1.91		1.91
JENDD13004	107.6	108.6	1	19478		HC	MOLAB AS	2013-04-11	0.21		0.21
JENDD13008	66.1	67.1	1	20688		HC	MOLAB AS	2013-04-17	0.96		0.96
JENDD13008	67.1	67.4	0.3	20689		HC	MOLAB AS	2013-04-17	2.95	0.15	2.8
JENDD13008	67.4	68.4	1	20690		HC	MOLAB AS	2013-04-17	0.06		0.06
JENDD13008	75.65	76.65	1	20692		HC	MOLAB AS	2013-04-17	0.35		0.35
JENDD13008	76.65	77.25	0.6	20693		HC	MOLAB AS	2013-04-17	1.71		1.71
JENDD13008	77.25	78.35	1.1	20694		HC	MOLAB AS	2013-04-17	11.5	0.16	11.34
JENDD13008	78.35	79.35	1	20695		HC	MOLAB AS	2013-04-17	1.33		1.33
JENDD13008	79.35	80.35	1	20696		HC	MOLAB AS	2013-04-17	0.21		0.21
JENDD13008	80.35	81.4	1.05	20697			MOLAB AS	2013-04-17	0.1		0.1
JENDD13008	81.4	81.8	0.4	20698		HC	MOLAB AS	2013-04-17	0.61		0.61
JENDD13008	81.8	82.5	0.7	20699		HC	MOLAB AS	2013-04-17	11.7	-0.1	11.7
JENDD13008	82.5	83	0.5	20701		HC	MOLAB AS	2013-04-17	2.18	0.63	1.55
JENDD13008	83	84.5	1.5	20702		HC	MOLAB AS	2013-04-17	0.07		0.07
JENDD13008	84.5	85.4	0.9	20703		HC	MOLAB AS	2013-04-17	0.07		0.07
JENDD13008	85.4	86.4	1	20704		HC	MOLAB AS	2013-04-17	0.11		0.11
JENDD13008	86.4	87.6	1.2	20706		HC	MOLAB AS	2013-04-17	1.57		1.57
JENDD13008	87.6	87.95	0.35	20707		HC	MOLAB AS	2013-04-17	6.51	0.12	6.39
JENDD13008	87.95	88.95	1	20708		HC	MOLAB AS	2013-04-17	22	0.1	21.9
JENDD13008	88.95	89.95	1	20709		HC	MOLAB AS	2013-04-17	23	-0.1	23
JENDD13008	89.95	91.15	1.2	20711		HC	MOLAB AS	2013-04-17	21.01	0.12	20.89
JENDD13008	91.15	91.65	0.5	20712		HC	MOLAB AS	2013-04-17	1.16		1.16
JENDD13008	91.65	92.65	1	20713		HC	MOLAB AS	2013-04-17	0.14		0.14
JENDD13008	92.65	94	1.35	20714		HC	MOLAB AS	2013-04-17	1.85		1.85
JENDD13008	94	95	1	20715			MOLAB AS	2013-04-17	17.51	-0.1	17.51
JENDD13008	95	96	1	20716			MOLAB AS	2013-04-17	13.46	0.21	13.25
JENDD13008	96	96.55	0.55	20717			MOLAB AS	2013-04-17	10.43	0.1	10.33
JENDD13008	96.55	97.55	1	20718			MOLAB AS	2013-04-17	2	1.59	0.41
JENDD13008	97.55	98.55	1	20719			MOLAB AS	2013-04-17	0.18		0.18
JENDD13008	98.55	99.5	0.95	20721			MOLAB AS	2013-04-17	0.22		0.22
JENDD13008	99.5	99.95	0.45	20722			MOLAB AS	2013-04-17	4.3	0.16	4.14
JENDD13008	99.95	100.4	0.45	20723		HC	MOLAB AS	2013-04-17	0.45		0.45
JENDD13008	100.4	100.9	0.5	20724		HC	MOLAB AS	2013-04-17	0.26		0.26
JENDD13008	100.9	101.95	1.05	20725		HC	MOLAB AS	2013-04-13	0.27		0.27
JENDD13008	101.95	102.5	0.55	20726		HC	MOLAB AS	2013-04-13	3.03	1.65	1.38
JENDD13008	102.5	103.5	1	20727		HC	MOLAB AS	2013-04-13	2.83	2.32	0.51
JENDD13008	103.5	103.75	0.25	20728		HC	MOLAB AS	2013-04-13	6.34	-0.1	6.34
JENDD13008	103.75	104.75	1	20729		HC	MOLAB AS	2013-04-13	0.12		0.12
JENDD13008	104.75	105.8	1.05	20731		HC	MOLAB AS	2013-04-13	0.09		0.09
JENDD13010	34.55	35.55	1	20772		HC	MOLAB AS	2013-04-20	9.94	9.6	0.34
JENDD13010	35.55	36.55	1	20773		HC	MOLAB AS	2013-04-20	0.26		0.26
JENDD13010	36.55	37.55	1	20774		HC	MOLAB AS	2013-04-20	0.09		0.09
JENDD13010	37.55	38.55	1	20775		HC	MOLAB AS	2013-04-20	0.27		0.27
JENDD13010	38.55	39.55	1	20776		HC	MOLAB AS	2013-04-20	0.16		0.16
JENDD13010	39.55	40.55	1	20777			MOLAB AS	2013-04-20	0.29		0.29
JENDD13010	40.55	41.55	1	20778		HC	MOLAB AS	2013-04-20	0.47		0.47
JENDD13010	41.55	42.9	1.35	20779		HC	MOLAB AS	2013-04-20	0.19		0.19
JENDD13010	42.9	43.55	0.65	20782		HC	MOLAB AS	2013-04-20	0.98		0.98
JENDD13010	43.55	44	0.45	20783		HC	MOLAB AS	2013-04-20	0.22		0.22
JENDD13010	44	44.2	0.2	20784		HC	MOLAB AS	2013-04-20	0.48		0.48
JENDD13010	44.2	44.9	0.7	20785		HC	MOLAB AS	2013-04-20	10.61	-0.1	10.61
JENDD13010	44.9	45.9	1	20786		HC	MOLAB AS	2013-04-20	0.64		0.64
JENDD13010	45.9	46.9	1	20787		HC	MOLAB AS	2013-04-20	0.18		0.18
JENDD13012	52.35	53.35	1	20846		HC	MOLAB AS	2013-04-22	8.11	8.02	0.09
JENDD13012	53.35	54.35	1	20847		HC	MOLAB AS	2013-04-22	0.22		0.22
JENDD13012	54.35	55.35	1	20848		HC	MOLAB AS	2013-04-22	0.3		0.3
JENDD13012	55.35	56.8	1.45	20849		HC	MOLAB AS	2013-04-22	0.32		0.32
JENDD13012	56.8	57.3	0.5	20851		HC	MOLAB AS	2013-04-22	5.78	-0.1	5.78
JENDD13012	57.3	58.65	1.35	20852		HC	MOLAB AS	2013-04-22	31.28	-0.1	31.28
JENDD13012	58.65	59	0.35	20853		HC	MOLAB AS	2013-04-22	1.06		1.06
JENDD13012	59	59.25	0.25	20854		HC	MOLAB AS	2013-04-22	33.16	-0.1	33.16
JENDD13012	59.25	60.25	1	20856		HC	MOLAB AS	2013-04-22	1.54		1.54
JENDD13012	60.25	60.95	0.7	20857		HC	MOLAB AS	2013-04-22	3.02	0.15	2.87
JENDD13012	60.95	61.4	0.45	20858		HC	MOLAB AS	2013-04-22	0.16		0.16
JENDD13012	62.9	63.9	1	20859		HC	MOLAB AS	2013-04-22	0.86		0.86
JENDD13012	63.9	64.9	1	20861		HC	MOLAB AS	2013-04-22	0.08		0.08
JENDD13012	82	83	1	20862		HC	MOLAB AS	2013-04-22	0.22		0.22
JENDD13012	83	83.3	0.3	20863		HC	MOLAB AS	2013-04-22	1.13		1.13
JENDD13012	83.3	83.7	0.4	20864		HC	MOLAB AS	2013-04-22	3.34	3.3	0.04
JENDD13012	83.7	84.7	1	20865		HC	MOLAB AS	2013-04-22	0.08		0.08
JENDD13012	84.7	85.9	1.2	20866		HC	MOLAB AS	2013-04-22	0.64		0.64
JENDD13012	85.9	86.9	1	20867		HC	MOLAB AS	2013-04-22	0.17		0.17
JENDD13012	86.9	87.9	1	20868		HC	MOLAB AS	2013-04-22	0.2		0.2
JENDD13012	87.9	88.7	0.8	20869		HC	MOLAB AS	2013-04-22	9.81	-0.1	9.81
JENDD13012	88.7	88.9	0.2	20871		HC	MOLAB AS	2013-04-22	13.57	0.41	13.16
JENDD13012	88.9	89.45	0.55	20872		HC	MOLAB AS	2013-04-22	0.79		0.79
JENDD13012	89.45	90.3	0.85	20873		HC	MOLAB AS	2013-04-22	26.5	0.14	26.36
JENDD13012	90.3	91.3	1	20874		HC	MOLAB AS	2013-04-22	4.64	0.32	4.32
JENDD13012	91.3	92.3	1	20875		HC	MOLAB AS	2013-04-22	2.41	-0.1	2.41
JENDD13012	92.3	93.4	1.1	20876		HC	MOLAB AS	2013-04-22	6.82	-0.1	6.82
JENDD13012	93.4	94.4	1	20877		HC	MOLAB AS	2013-04-22	1.2		1.2
JENDD13012	94.4	95.5	1.1	20878		HC	MOLAB AS	2013-04-22	0.1		0.1

## Sheet: Petrophysics
NGU no.	Sample No	UTM Zone	UTMX	UTMY	Sample description	Volume (cm3)	Density (g/cm3)	Pore volume (cm3)	Porosity (%)	Susceptibility (10-6 SI)	Remanens (mA/M)	Heat conductivity, k (W/mK)	Specific heat capasity, cp (J/kgK)	Total Sulphur (% TS)	Total Carbon (% TC)
137102	HG26-16	33	607861	7705123	Graphite schist	56.76	2.4	3.65	0.06	1026.59	5.89	n/a	n/a	0.406	4.77
137103	HG27-16	33	607857	7705123	Graphite schist	62.16	2.29	6.67	0.11	1001.6	8.47	n/a	n/a	0.379	6.855
137104	HG28-16	33	607618	7705037	Graphite schist	139.53	2.31	11.6	0.08	1102.86	4.91	n/a	n/a	0.473	5.565
137105	HG29-16	33	607940	7704925	Graphite schist	140.88	2.34	13.5	0.1	1138.25	2.24	n/a	n/a	0.582	9.105
137106	HG30-16	33	608092	7704991	Graphite schist	87.48	2.27	8.94	0.1	911.463	9.88	n/a	n/a	0.295	10.38
137107	HG31-16	33	607993	7705045	Graphite schist	35.44	2.42	3.92	0.11	739.793	24.52	n/a	n/a	0.0256	6.765
137108	HG32-16	33	607993	7705036	Graphite schist	88.94	2.36	10.81	0.12	1308.02	5.97	n/a	n/a	0.119	8.355
137110	HG34-16	33	608002	7705049	Graphite schist	118.27	2.22	11.46	0.1	861.524	6.41	n/a	n/a	0.212	12.6
137112	HG36-16	33	609368	7702499	Graphite schist	112.97	2.3	12.23	0.11	1292.02	5.64	n/a	n/a	0.741	3.495
137113	HG37-16	33	609245	7702815	Graphite schist	86.65	2.35	6.94	0.08	1141.21	7.02	n/a	n/a	0.102	7.92
137114	HG38-16	33	609243	7702817	Graphite schist	95.21	2.32	8.07	0.08	993.383	8.7	n/a	n/a	0.85	11.64
137116	HG40-16	33	609633	7702117	Graphite schist	75.95	2.21	8.42	0.11	1018.51	7.72	n/a	n/a	0.263	5.505
137117	HG41-16	33	609581	7702693	Graphite schist	35.6	2.44	1.82	0.05	1229.82	24.38	n/a	n/a	0.121	6.69
137118	Hg42-16	33	609553	7702741	Graphite schist	92.28	2.29	9.18	0.1	1162.26	11.72	n/a	n/a	0.0751	5.76
137119	HG43-16	33	607397	7705070	Graphite schist	82.4	2.39	5.37	0.07	963.456	10.47	n/a	n/a	0.255	7.065
137120	HG44-16	33	607410	7705025	Graphite schist	75.44	2.41	5.7	0.08	1146.12	15.71	n/a	n/a	0.357	7.08
137122	HG46-16	33	607421	7705060	Graphite schist	73.02	2.29	6.2	0.08	950.378	8.13	n/a	n/a	0.0553	40.3
137123	HG47-16	33	607569	7705058	Graphite schist	46.23	2.44	2.74	0.06	1002.48	20.64	n/a	n/a	0.14	6.12
137124	HG48-16	33	607620	7705036	Graphite schist	98.97	2.26	10.49	0.11	949.635	4.34	n/a	n/a	0.304	5.76
137126	HG50-16	33	609078	7702923	Graphite schist	59.74	2.3	5.49	0.09	1076.46	13.79	n/a	n/a	0.164	5.73
137127	HG51-16	33	609089	7702916	Graphite schist	40.39	2.39	3.02	0.07	1010.06	13.85	n/a	n/a	0.547	1.94
137129	HG53-16	33	607423	7705078	Graphite schist	81.01	2.45	4.47	0.06	1156.34	7.88	n/a	n/a	0.657	9.54
137130	HG54-16	33	607727	7705409	Graphite schist	97.47	2.31	7.79	0.08	1057.72	7.44	n/a	n/a	0.344	5.475
137131	HG55-16	33	607823	7705245	Graphite schist	126.21	2.5	10.14	0.08	1457.6	6.32	n/a	n/a	0.0324	6.525
137132	HG56-16	33	607903	7705096	Graphite schist	79.21	2.28	7.53	0.1	1049.45	94.81	n/a	n/a	0.134	9.975
137133	HG57-16	33	607911	7705081	Graphite schist	79.54	2.36	7.1	0.09	1253.8	13.1	n/a	n/a	0.174	10.98
137134	HG58-16	33	607972	7705045	Graphite schist	54.76	2.43	5.23	0.1	943.518	7.49	n/a	n/a	0.0212	31.35
137135	HG59-16	33	608095	7704991	Graphite schist	72.84	2.15	10.25	0.14	1095.3	5.55	n/a	n/a	0.479	9.48
137136	HG60-16	33	608063	7704863	Graphite schist	55.23	2.25	5.62	0.1	903.18	13.13	n/a	n/a	0.118	9.48
137137	HG61-16	33	608085	7704848	Graphite schist	102.09	2.22	10.41	0.1	1149.53	3.49	n/a	n/a	0.423	5.34
137138	HG62-16	33	608096	7704677	Graphite schist	86.32	2.12	10.23	0.12	1035.27	4.48	n/a	n/a	0.224	6.495
137139	HG63-16	33	608092	7704682	Graphite schist	59.58	2.18	6.92	0.12	972.911	6.67	n/a	n/a	0.335	6.555
137140	HG64-16	33	607583	7705249	Graphite schist	94.27	2.43	7.18	0.08	1125.68	6.18	n/a	n/a	0.175	1.12
137141	HG65-16	33	607228	7705022	Graphite schist	159.46	2.36	12.12	0.08	932.748	2.91	n/a	n/a	0.0908	4.56
137142	HG66-16	33	607208	7705023	Graphite schist	121.52	2.35	9.95	0.08	1131.41	5	n/a	n/a	0.376	5.43
137143	HG67-16	33	607364	7705122	Graphite schist	79.35	2.42	5.05	0.06	954.756	6.62	n/a	n/a	0.201	3.99
137145	HG69-16	33	617697	7702362	Graphite schist	34.24	2.39	2.45	0.07	838.848	13.24	n/a	n/a	0.846	8.46
140107	hg7-16	33	486190	7627797	Graphite schist	61.97	2.47	3.11	0.05	923.061	19.39	n/a	n/a	0.0902	11.7
140112	hg12-16	33	505770	7642183	Graphite schist	140.63	2.17	16.38	0.12	845.335	2.68	n/a	n/a	0.0415	11.7
140113	hg13-16	33	497896	7640656	Graphite schist	63.45	2.66	0.48	<0.01	962.927	18.56	n/a	n/a	2.58	0.395
140114	hg14-16	33	497840	7640813	Graphite schist	110.16	2.38	8.79	0.08	968.23	4.8	n/a	n/a	0.0841	6.91
140116	hg16-16	33	510039	7624973	Graphite schist	133.8	2.36	11.94	0.09	1181.38	5.25	n/a	n/a	0.0893	0.847
140118	hg18-16	33	500587	7634047	Graphite schist	124.4	2.19	19.58	0.16	1208.47	3.72	n/a	n/a	1.33	3.62
140120	hg20-16	33	500620	7634013	Graphite schist	194.97	2.62	5.1	0.03	1013.36	10.17	n/a	n/a	1.2	11.9
140122	hg22-16	33	500625	7634004	Graphite schist	24.77	2.9	0.37	0.01	951.69	128.68	n/a	n/a	10.9	15.4
137179	JK29517-8	33	497532	7638596	Graphite schist	44.92	2.51	0.68	0.02	345.466	60.32	8.93	1042	0.0262	8.57
137180	JK29517-pf7	33	497558	7638628	Graphite schist	41.33	2.8	2.26	0.05	1002.58	22.65	2.6	733	0.148	0.373
137181	JK29517-9	33	499051	7638736	Graphite schist	29.39	2.34	2.09	0.07	853.496	23.27	5.17	1008	0.333	13.2
137183	JK30517-5	33	487246	7586598	Graphite schist	32.99	2.51	1.86	0.06	452.842	24.32	3.06	841	0.123	3.3
137185	JK3617-1	33	505880	7642242	Graphite schist	62.33	2.82	1.37	0.02	2101.39	462.22	2.8	737	0.121	23.1
137190	JK5617-4	33	510988	7628559	Graphite schist	54.63	2.23	5.61	0.1	631.156	11.83	8.46	1163	0.129	21.7
137182	JK30517-3	33	487853	7589590	Graphite schist	31.07	2.44	2.5	0.08	510.636	24.64	3.37	882	0.389	6.29
137189	JK3617-7	33	505584	7641943	Graphite schist	48	2.48	2.52	0.05	498.566	9.22	2.76	836	0.0574	9.83
137182	JK30517-3	33	487853	7589590	Graphite schist	31.07	2.44	2.5	0.08	510.636	24.64	3.37	882	0.389	6.29
137157	H3-17	33	487668	7626464	Graphite schist	61.28	2.4	2.58	0.04	-63.5427	19.2	8.11	1074	0.01	17.2
137159	H5-17	33	487668	7626464	Graphite schist	87.67	2.44	3.41	0.04	-126.654	21.73	6.66	1019	0.01	18.2
137160	Hg6-17	33	487722	7626399	Graphite schist	133.47	2.41	5.68	0.04	-133.711	9.3	5.57	995	0.357	19.2
137165	hg12-17	33	487012	7587147	Graphite schist	101.6	2.39	6.34	0.06	1.25391	9.3	4.17	942	0.99	20.2
137166	hg14-17	33	486962	7588922	Graphite schist	162	2.31	9.15	0.06	69.1557	5.96	27.42	1114	0.336	21.2
137167	Hg15-17	33	486969	7588919	Graphite schist	89.93	2.22	5.59	0.06	30.2393	6.95	11.57	1214	0.475	22.2
137168	Hg16-17	33	487019	7588991	Graphite schist	81.16	2.38	3.66	0.05	-210.805	6.04	12.6	1140	0.0342	23.2
137170	Hg18-17	33	486981	7588914	Graphite schist	84.3	2.43	3.42	0.04	-102.778	7.19	10.54	1100	0.01	24.2
137171	hg19-17	33	487017	7588984	Graphite schist	154.7	2.53	5.02	0.03	-113.813	3.13	4.86	916	0.0335	25.2
137172	hg20-17	33	502146	7628862	Graphite schist	183.13	2.42	16.76	0.09	87.1409	5.82	4.58	948	0.0259	26.2
137173	hg21-17	33	502135	7628872	Graphite schist	59.56	2.33	4.16	0.07	199.29	9.66	n/a	n/a	0.0619	27.2
137174	hg22-17	33	502059	7628968	Graphite schist	201.19	2.71	10.26	0.05	405.08	5.68	3.94	821	0.01	28.2
140101	hg1-16	33	486140	7627616	Graphite schist	147.3	1.92	18.35	0.12	748.304	35.36	n/a	n/a	0.0386	29.2
140102	hg2-16	33	486142	7627618	Graphite schist	83.91	2.28	8.47	0.1	344.965	3.03	4.67	1012	0.154	30.2
140105	hg5-16	33	486193	7627799	Graphite schist	137.45	2.22	10.49	0.08	-67.8459	12.38	2.89	942	0.0675	31.2
140109	hg9-16	33	505696	7642187	Graphite schist	105.77	2.34	6.48	0.06	-55.1116	5.4	8.59	1111	-0.02	32.2
140110	hg10-16	33	505696	7642187	Graphite schist	131.6	2.3	9.04	0.07	-9.68216	7.13	7.65	1109	-0.02	33.2
140111	hg11-16	33	505770	7642183	Graphite schist	250.11	2.18	26.27	0.11	-86.6902	5.32	6.11	1115	0.0845	34.2
140117	hg17-16	33	510039	7624973	Graphite schist	88.44	2.62	2.72	0.03	481.345	11.25	2.69	787	0.0563	35.2
140123	hg23-16	33	500634	7633995	Graphite schist	233.68	2.21	20.77	0.09	-89.597	5.03	10.05	1202	0.155	36.2
140124	hg24-16	33	488563	7620431	Graphite schist	128.83	2.43	9.62	0.07	232.514	6.98	7.66	1050	0.0731	37.2
140130	JK5 (B)	33	486141	7627615	Graphite schist	59.86	2.35	5.99	0.1	60.5461	13.24	7.41	1079	0.0235	38.2
82200	AND 1452B	33	542110	7670382	Graphite schist	144.17	2.644			15.7				< 0.02	2.26
82255	AND 1461	33	541920	7670414	Graphite schist	222.46	2.669			223.5				0.224	2.7
82282	AND 14113	33	539533	7667765	Graphite schist	195.3	2.754			659.8				5.03	4.87
71959	HG9-12	33	487621	7626290	Graphite schist	93.77	2.477			120.5	7.6				9.256
71960	HG10-12	33	487621	7626290	Graphite schist	46.8	2.302			0	0				17.13
71961	HG11-12	33	487589	7626310	Graphite schist	104.23	2.674			563.9	502.1				4.047
71962	HG12-12	33	487589	7626310	Graphite schist	155.59	2.648			770.1	615.3				2.827
71963	HG13-12	33	487589	7626310	Graphite schist	104.23	2.523			347	0				5.44
71964	HG14-12	33	488356	7619263	Graphite schist	40.42	2.366			-111.8	0				33.82
71965	HG15-12	33	488356	7619263	Graphite schist	70.07	2.53			32.3	10.2				14.71
71966	HG16-12	33	488356	7619263	Graphite schist	31.48	2.34			-143.6	22.6				33.68
71967	HG17-12	33	488356	7619263	Graphite schist	51.1	2.26			-88.5	19.7				33.71
71968	HG18-12	33	488238	7618895	Graphite schist	92.53	2.457			-48.8	0				14.21
71969	HG19-12	33	488238	7618895	Graphite schist	62.24	2.403			36.3	0				15.17
71970	HG20-12	33	488238	7618895	Graphite schist	107.07	2.413			-42.2	6.7				13.725
71971	HG21-12	33	488274	7618822	Graphite schist	73.11	2.433			-61.8	9.7				12.36
97603		33	488625	7.6229e+06	Graphite schist	116.93	2.806			815.1				0	14.2
71972	HG22-12	33	487144	7586575	Graphite schist	92.23	3			416.6	0				16.8
71973	HG23-12	33	487144	7586575	Graphite schist	42.79	2.899			422.6	16.7				19.7
71992	JW12-8	33	486956	7587163	Graphite schist	59.36	2.681			342.7	17				18.86
71951	HG1-12	33	510982	7625361	Graphite schist	115.78	2.634			351.4	0				9.327
71952	HG2-12	33	510785	7625331	Graphite schist	36.21	2.418			0	0				24.41
71953	HG3-12	33	510079	7625023	Graphite schist	51.73	2.369			0	27.5				23.02
71954	HG4-12	33	510102	7625026	Graphite schist	140.31	2.449			16.1	5.1				18.89
71955	HG5-12	33	507225	7625670	Graphite schist	91.36	2.388			-346.3	0				39.11
71956	HG6-12	33	507225	7625670	Graphite schist	75.55	2.406			-239.3	0				36.7
71957	HG7-12	33	508574	7625822	Graphite schist	151.41	2.49			104.5	4.7				15.57
71958	HG8-12	33	508574	7625822	Graphite schist	144.77	2.853			281	4.9				9.014
71985	JW12-1	33	510982	7625362	Graphite schist	116.47	2.63			291.1	6.1				7.4
71986	JW12-2	33	510982	7625362	Graphite schist	46.03	2.527			147.3	21.9				5.6905
71987	JW12-3	33	510785	7625343	Graphite schist	77.84	2.393			-29	12.9				18.37
71988	JW12-4	33	510084	7625026	Graphite schist	109.93	2.34			20.6	0				21.14
71989	JW12-5	33	510084	7625026	Graphite schist	101.9	2.406			-44.4	7				24.03
71990	JW12-6	33	507580	7625322	Graphite schist	83.14	2.363			-163.1	12.1				36.68
71991	JW12-7	33	507580	7625322	Graphite schist	39.49	2.472			0	31.3				28.62
82142	ØKS 1464A	33	502119	7628636	Graphite schist	79.43	2.685			199.2				2.87	8.58
92132	JEN 1460A	33	512767	7626493	Graphite schist	119.37	2.482			151.5				0.146	15.2
92134	JEN 1461A	33	512765	7626502	Graphite schist	64.12	2.503			141				0.257	10.9
82075	ØKS 1323B-1	33	498963	7639395	Graphite schist	154.22	2.586			263.8	14.6			3.05	15.5
82120	ØKS 1435A	33	498815	7639408	Graphite schist	235.5	3.002			652.7				2.32	3.44
82121	ØKS 1435B	33	498815	7639408	Graphite schist	211.4	2.798			2000.6				5.92	16.3
82127	ØKS 1449A	33	497526	7638615	Graphite schist	142.12	2.916			2291.8				17.9	2.65
82189	ØKS 14129C	33	498263	7640351	Graphite schist	151.69	2.374			14.9				0.165	27.8
092191	BD Øks 1601a	33	500639	7.634e+06	Graphite schist	83.38	2.33			334.095	6.76			0.284	17.3
092192	BD Øks 1601b	33	500639	7.634e+06	Graphite schist	49.4	2.43			352.958	12.59			1.12	18.2
092193	BD Øks 1602a	33	500412	7.63479e+06	Graphite schist	137.68	2.29			311.928	6.73			0.0307	31
092198	BD Øks 1605	33	500730	7.63476e+06	Graphite schist	69.94	2.63			550.321	8.54			0.39	3.92
092200	BD Øks 1607	33	500804	7.63494e+06	Graphite schist	82.12	2.56			351.24	11.69			0.517	14.7
099390	BD Øks 1609	33	500454	7.6346e+06	Graphite schist	42.5	2.25			293.843	18.45			0.0636	14.2
							2.43674
